# Supplementary material for: Fuziline Ameliorates Glucose and Lipid Metabolism by Activating Beta Adrenergic Receptors to Stimulate Thermogenesis
Source: MDPI journal article supplement (doi:10.3390/ijms24098362), 2023-05-06
Supplement: s1 [file s1]

# Supporting Information

## Fuziline Ameliorates Glucose and Lipid Metabolism by Activating Beta Adrenergic Receptors to Stimulate Thermogenesis

### 1 UPLC-Q/TOF-MS analysis conditions

An UPLC system equipped with a Q/TOF-MS and electrospray ionization (ESI) source was used to analyze the samples. A C18 column (BEH,  $2.1 \times 100$  mm,  $1.7 \mu\text{m}$ ; Waters, USA) was applied to separate the samples. The mobile phase was a gradient of A (0.1% formic acid/H<sub>2</sub>O) and B (CH<sub>3</sub>CN), conditions are described (**Table S1**) The flow rate was 0.40 mL/min, and the column temperature was maintained at 30 °C. PDA detection 190-400 nm scan was run and injection volume was 2.0  $\mu\text{L}$ .

**Table S1** Mobile phase elution conditions

| Time(min) | Flow(mL·min <sup>-1</sup> ) | A(%) | B(%)  | Curve   |
|-----------|-----------------------------|------|-------|---------|
| Initial   | 0.400                       | 98.0 | 2.0   | Initial |
| 2.00      | 0.400                       | 85.0 | 15.0  | 4       |
| 6.00      | 0.400                       | 82.0 | 18.0  | 4       |
| 7.00      | 0.400                       | 78.0 | 22.0  | 4       |
| 16.00     | 0.400                       | 65.0 | 35.0  | 4       |
| 18.00     | 0.400                       | 45.0 | 55.0  | 4       |
| 23.00     | 0.400                       | 0.0  | 100.0 | 4       |
| 25.00     | 0.400                       | 98.0 | 2.0   | 4       |
| 26.00     | 0.400                       | 98.0 | 2.0   | 4       |

The MS analysis conditions were as follows: The capillary voltage was 3.0 kV Use of high purity nitrogen as atomisation and auxiliary gas and the desolvation gas flow was 800 L/h at a desolvation temperature of 400 °C. The sample cone voltage was 40 V, cone gas of 50 L/h, and the source temperature was maintained at 120 °C. Sampling frequency was 0.1 s and interval was 0.02 s. Full-scan data were gathered from 50 to 1500 Da in positive mode. The MassLynx software was used to acquire and analyze all data (v4.1, Water, Milford, USA).

## 2 Structural analysis of compounds in the total extract of *Radix aconiti carmichaeli*

The primary and secondary mass spectra of the constituents of the extract of Aconite were analysed using UPLC/Q-TOF-MS, respectively, and i compounds contained in the samples was determined by reviewing the literature. The ion fragmentation pattern was then analysed according to the ion fragmentation information in the secondary mass spectra and compared with the reference papers.

A total of 23 chemical components including aconitine were identified in the total extract of *Radix aconiti carmichaeli* (**Figure S1**). The identification results (**Table S2**) and chemical structural formula (**Figure S2**) of specific components are shown in the following figures and tables.

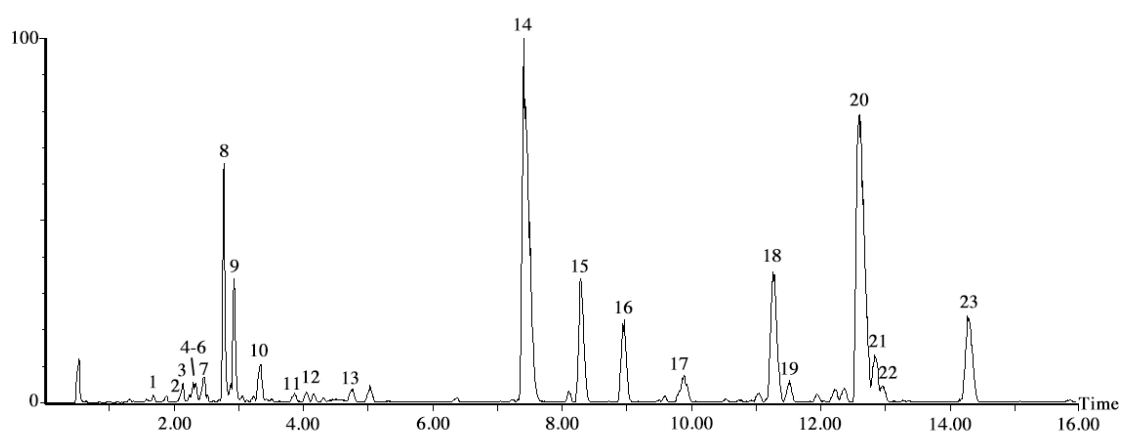

**Figure S1** UPLC/Q-TOF-MS analysis (positive ion mode) of the total extract of *Radix aconiti carmichaeli*

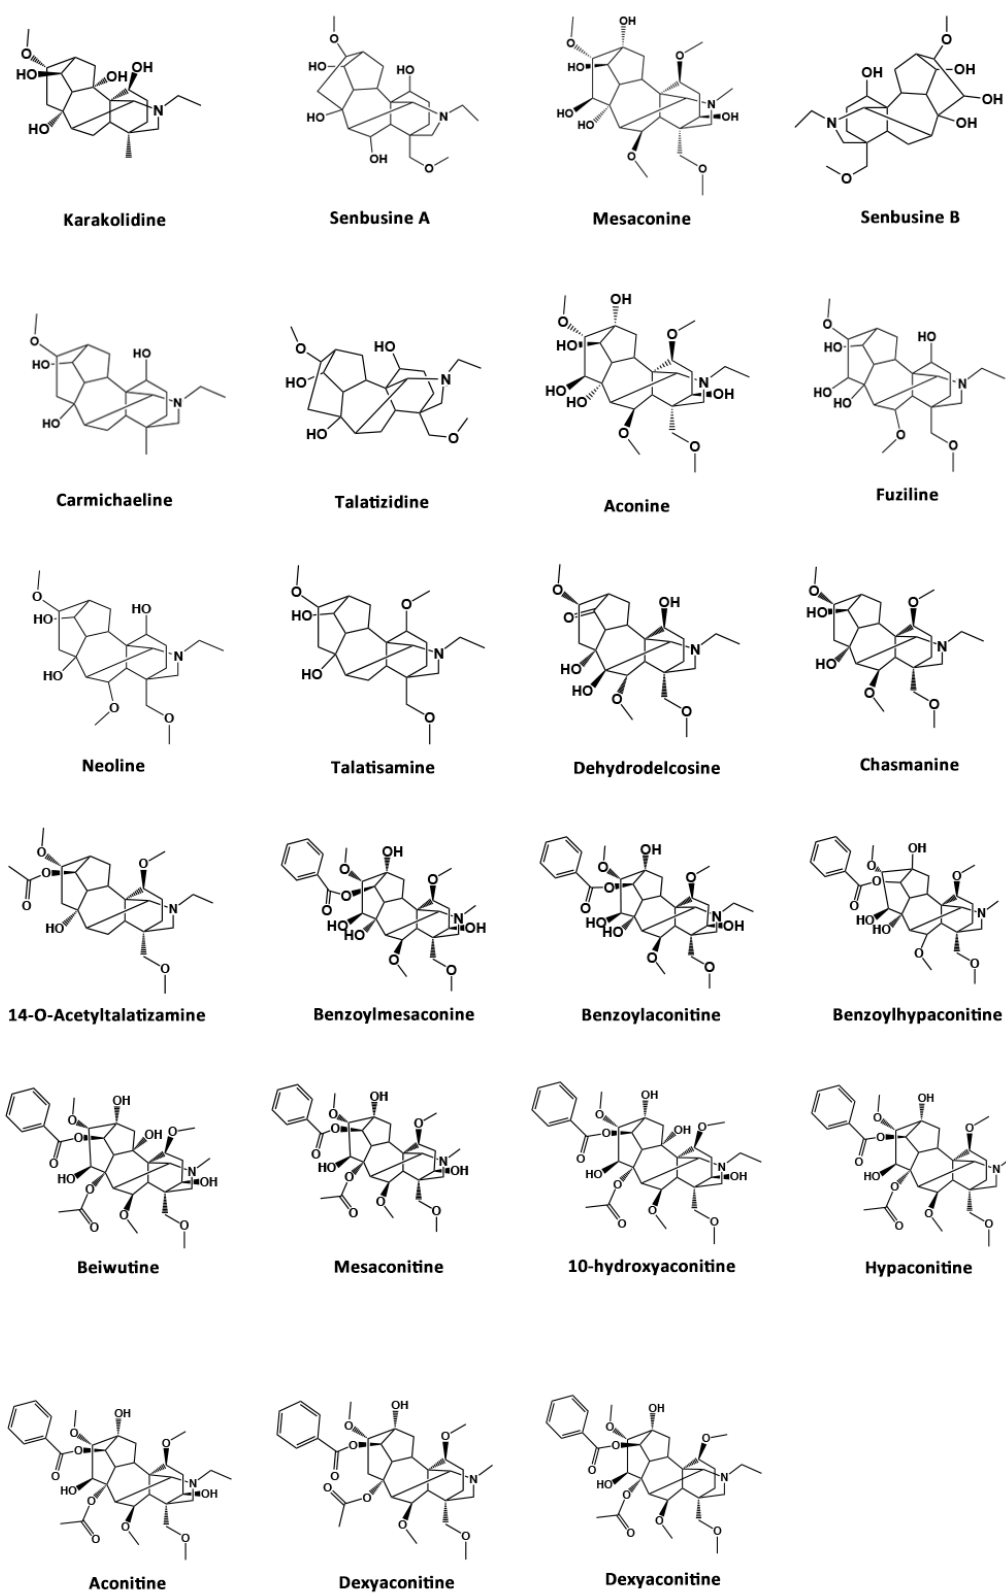

**Figure S2** Chemical structure formulae of alkaloid components in the total extract of *Radix aconiti*  
*carmichaeli*

**Table S2** Analytical table for the identification of alkaloid components in the total extract of *Radix aconiti carmichaeli*

| No. | $t_R$ /min | Identification | Exact Mass | $m/z$    | MS/MS                                                                                                                          | Composition                                     |
|-----|------------|----------------|------------|----------|--------------------------------------------------------------------------------------------------------------------------------|-------------------------------------------------|
| 1   | 1.68       | Karakolidine   | 393.52     | 394.2603 | 394[M+H] <sup>+</sup>                                                                                                          | C <sub>22</sub> H <sub>35</sub> NO <sub>5</sub> |
| 2   | 2.06       | Senbusine A    | 423.54     | 424.2697 | 424[M+H] <sup>+</sup> , 374[M+H-CH <sub>3</sub> OH-H <sub>2</sub> O] <sup>+</sup> ,                                            | C <sub>23</sub> H <sub>37</sub> NO <sub>6</sub> |
| 3   | 2.13       | Mesaconine     | 485.57     | 486.2687 | 486[M+H] <sup>+</sup> , 376[M+H-2CH <sub>3</sub> OH-CO-H <sub>2</sub> O] <sup>+</sup>                                          | C <sub>24</sub> H <sub>39</sub> NO <sub>9</sub> |
| 4   | 2.23       | Senbusine B    | 423.54     | 424.2697 | 424[M+H] <sup>+</sup> , 394[M+H-CH <sub>2</sub> O] <sup>+</sup>                                                                | C <sub>23</sub> H <sub>37</sub> NO <sub>6</sub> |
| 5   | 2.30       | Carmichaeline  | 377.52     | 378.2636 | 378[M+H] <sup>+</sup> , 360[M+H-H <sub>2</sub> O] <sup>+</sup>                                                                 | C <sub>22</sub> H <sub>35</sub> NO <sub>4</sub> |
| 6   | 2.33       | Talatizidine   | 407.54     | 408.2761 | 408[M+H] <sup>+</sup>                                                                                                          | C <sub>22</sub> H <sub>37</sub> NO <sub>5</sub> |
| 7   | 2.45       | Aconine        | 499.59     | 500.2879 | 500[M+H] <sup>+</sup> , 408[M+H-2CH <sub>3</sub> OH-CO] <sup>+</sup>                                                           | C <sub>25</sub> H <sub>41</sub> NO <sub>9</sub> |
| 8   | 2.77       | Fuziline       | 453.57     | 454.2811 | 454[M+H] <sup>+</sup> , 436[M+H-H <sub>2</sub> O] <sup>+</sup>                                                                 | C <sub>24</sub> H <sub>39</sub> NO <sub>7</sub> |
| 9   | 2.93       | Neoline        | 437.57     | 438.2867 | 438[M+H] <sup>+</sup> , 420[M+H-H <sub>2</sub> O] <sup>+</sup> , 342[M+H-CH <sub>3</sub> OH-CO-2H <sub>2</sub> O] <sup>+</sup> | C <sub>24</sub> H <sub>39</sub> NO <sub>6</sub> |

|    |       |                         |        |          |                                                                                      |                                                  |
|----|-------|-------------------------|--------|----------|--------------------------------------------------------------------------------------|--------------------------------------------------|
| 10 | 3.34  | Talatisamine            | 421.57 | 422.2889 | 422[M+H] <sup>+</sup> , 344[M+H-CH <sub>3</sub> OH-CO-H <sub>2</sub> O] <sup>+</sup> | C <sub>24</sub> H <sub>39</sub> NO <sub>5</sub>  |
| 11 | 3.71  | Dehydrodelcosine        | 451.55 | 452.3009 | 452[M+H] <sup>+</sup> , 438[M+H-CH <sub>2</sub> ] <sup>+</sup>                       | C <sub>24</sub> H <sub>37</sub> NO <sub>7</sub>  |
| 12 | 4.05  | Chasmanine              | 451.59 | 452.3009 | 452[M+H] <sup>+</sup>                                                                | C <sub>25</sub> H <sub>41</sub> NO <sub>6</sub>  |
| 13 | 4.75  | 14-O-Acetyltalatizamine | 463.61 | 464.2999 | 464[M+H] <sup>+</sup>                                                                | C <sub>26</sub> H <sub>41</sub> NO <sub>6</sub>  |
| 14 | 7.41  | Benzoylmesaconine       | 589.67 | 590.2942 | 590[M+H] <sup>+</sup> , 558[M+H-CH <sub>3</sub> OH] <sup>+</sup>                     | C <sub>31</sub> H <sub>43</sub> NO <sub>10</sub> |
| 15 | 8.28  | Benzoylaconitine        | 603.70 | 604.3073 | 604[M+H] <sup>+</sup>                                                                | C <sub>32</sub> H <sub>45</sub> NO <sub>10</sub> |
| 16 | 8.96  | Benzoylhypaconitine     | 573.67 | 574.2979 | 574[M+H] <sup>+</sup>                                                                | C <sub>31</sub> H <sub>43</sub> NO <sub>9</sub>  |
| 17 | 9.9   | Beiwutine               | 647.71 | 648.3005 | 648[M+H] <sup>+</sup> , 588[M+H-2CH <sub>2</sub> O] <sup>+</sup>                     | C <sub>33</sub> H <sub>45</sub> NO <sub>12</sub> |
| 18 | 11.26 | Mesaconitine            | 631.71 | 632.3073 | 632[M+H] <sup>+</sup>                                                                | C <sub>33</sub> H <sub>45</sub> NO <sub>11</sub> |
| 19 | 11.51 | 10-hydroxyaconitine     | 661.73 | 662.3137 | 662[M+H] <sup>+</sup> , 586[M+H-CH <sub>2</sub> O-CO-H <sub>2</sub> O]               | C <sub>34</sub> H <sub>47</sub> NO <sub>12</sub> |
| 20 | 12.6  | Hypaconitine            | 615.71 | 616.3057 | 646[M+H] <sup>+</sup>                                                                | C <sub>33</sub> H <sub>45</sub> NO <sub>10</sub> |
| 21 | 12.85 | Aconitine               | 645.74 | 646.3190 | 616[M+H] <sup>+</sup>                                                                | C <sub>34</sub> H <sub>47</sub> NO <sub>11</sub> |
| 22 | 12.95 | Delphinine              | 599.71 | 600.3139 | 600[M+H] <sup>+</sup> , 572[M+H-CO] <sup>+</sup>                                     | C <sub>33</sub> H <sub>45</sub> NO <sub>9</sub>  |
| 23 | 14.28 | Dexyaconitine           | 629.74 | 630.3196 | 630[M+H] <sup>+</sup>                                                                | C <sub>34</sub> H <sub>47</sub> NO <sub>10</sub> |
